# Supplementary material for: The new dual anion solvent-free nickel complex based on the pyridine-4-carbohydrazide ligand
Source: Royal Society of Chemistry journal article supplement (doi:10.1039/d4nj02087a), 2024-01-01
Supplement: d4nj02087a1.pdf [file d4nj02087a1.pdf]

## Supporting Information

### The new dual anions solvent-free nickel complex based on the pyridine-4-carbohydrazide ligand

#### Contents

|                                                |          |
|------------------------------------------------|----------|
| <b>Experimental</b> .....                      | <b>2</b> |
| <b>Caution!</b> .....                          | <b>2</b> |
| <b>Materials and Equipment</b> .....           | <b>2</b> |
| <b>Enthalpy of Formation Calculation</b> ..... | <b>2</b> |
| <b>References</b> .....                        | <b>3</b> |
| <b>Supplementary Figures S1-S8</b> .....       | <b>4</b> |
| <b>Supplementary Table S1-S3</b> .....         | <b>7</b> |

## Experimental

### Caution!

Some of the studied compounds have the potential to be energetic materials that are heat, friction, and impact sensitive. To safeguard personal safety throughout the whole experiment, appropriate protective equipment (goggles, safety shields, rubber gloves, etc.) must be used.

### Materials and Equipment

The analytical grade reagents used in the experiment were bought from Aladdin and Azov and utilized without additional purification. The analytical grade reagents used in the experiment were bought from Aladdin and Azov and utilized without additional purification.

Differential scanning calorimetry (TGA/DSC2, METTLER TOLEDO) was used to study the thermal behavior of synthesized compound under a nitrogen environment and a heating rate of 5 °C·min<sup>-1</sup>.

Infrared (IR) spectra were measured on a Nicolet Is10 spectrometer with a measurement range of 4000 - 400 cm<sup>-1</sup>. On an elemental analyzer (Vario EL Cube, Germany), elemental analyses (C, H, N or C, H, N, O) were performed.

By using a BAM DFH-10 device with a weight drop of 5 kg, the standard step approach of the drop weight device was used to assess the mechanical sensitivities of the material, including impact sensitivity and friction sensitivity.

### Enthalpy of Formation Calculation

In this research, calculations of enthalpy of formation are performed based on its definition. Taking the compound C<sub>a</sub>H<sub>b</sub>N<sub>c</sub>O<sub>d</sub> as an example, the corresponding general equation for its formation reaction is as follows:

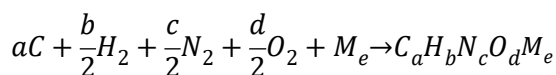

And the atomization reaction is employed to derive the enthalpy of formation according to the Hess law:

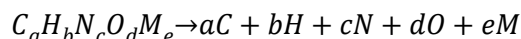

For the formation reaction, the gas-phase heat of reaction at 298 K can be calculated from the following equation:

$$\begin{aligned} \Delta_f H(C_aH_bN_cO_dM_e) \\ = a\Delta_f H(C) + b\Delta_f H(H) + c\Delta_f H(N) + d\Delta_f H(O) + e\Delta_f H(M) - \Delta H_{atomization} \end{aligned}$$

Where  $\Delta_f H(C)$ ,  $\Delta_f H(H)$ ,  $\Delta_f H(N)$ ,  $\Delta_f H(O)$  and  $\Delta_f H(M)$  are experimental gas phase enthalpies of formation of C, H, N and O atoms;  $\Delta H_{atomization}$  is standard reaction enthalpy for atomization reaction, which can be calculated by the following equation:

$$\Delta H_{atomization} = aH(C) + bH(H) + cH(N) + dH(O) + eH(M) - H(C_aH_bN_cO_d)$$

According to Hess law, the solid-phase enthalpy of formation can be obtained from the gas-phase enthalpy of formation of and the enthalpy of sublimation as follows:

$$\Delta H_{solid} = \Delta H_{gas} - \Delta H_{sublimation}$$

In this work, we obtained the enthalpy of sublimation using the method of ref. S1:

$$\Delta H_{sublimation} = a(SA)^2 + b\sqrt{v\sigma_{tot}^2} + c$$

Where  $SA$  is molecular surface area,  $v$  is equilibrium constant of positive and negative electrostatic potentials at the surface of the molecule and  $\sigma_{tot}$  is variance of total surface electrostatic potential. The details of heats of formation calculation are listed in **Table S1**.

#### **References**

[S1] P. Politzer, J. S. Murray, M. Edward Grice, M. Desalvo, E. Miller, *Molecular Physics* 1997, 91, 923-928.

## Supplementary Figures S1-S8

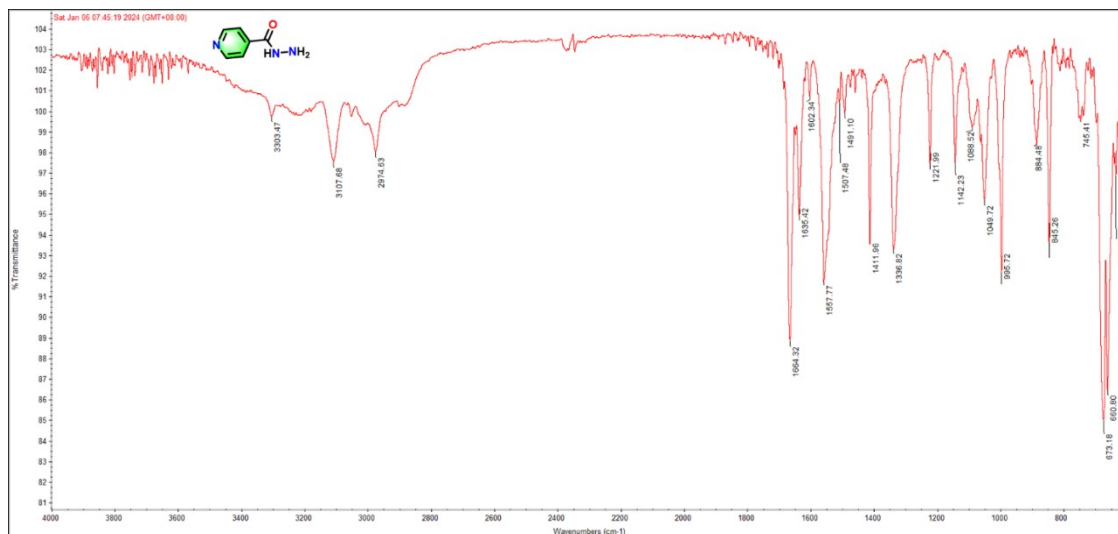

Figure S1 IR of 4-PDCA.

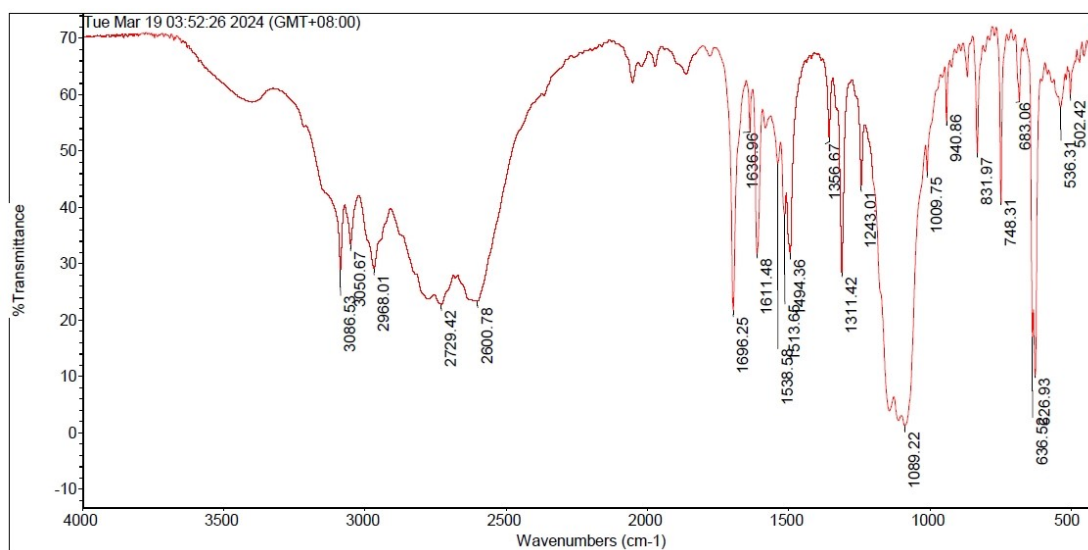

Figure S2 IR of 4-PDCA·2HClO<sub>4</sub>·H<sub>2</sub>O.

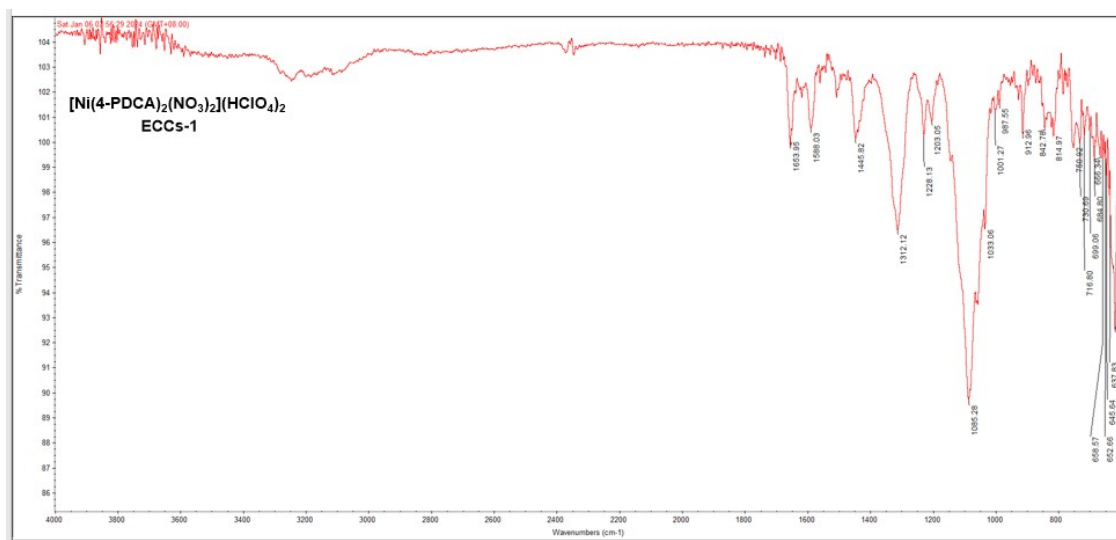

**Figure S3 IR of ECCs-1.**

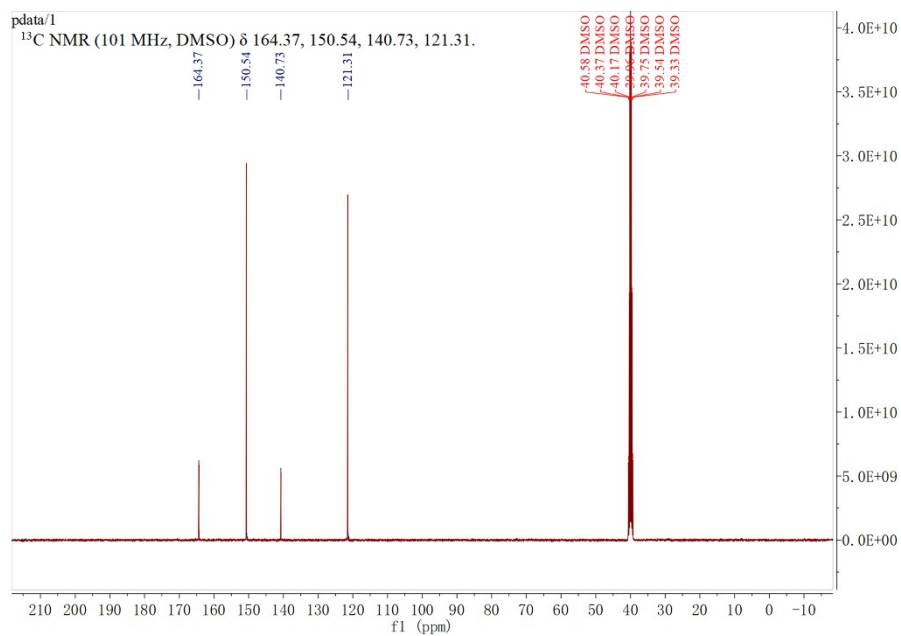

**Figure S4 <sup>13</sup>C NMR of 4-PDCA.**

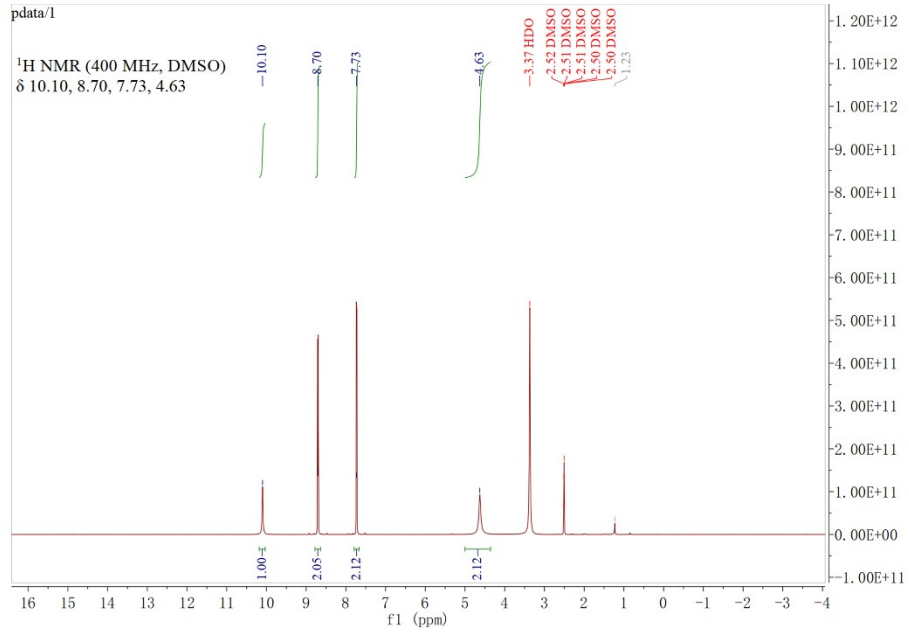

**Figure S5** <sup>1</sup>H NMR of 4-PDCA.

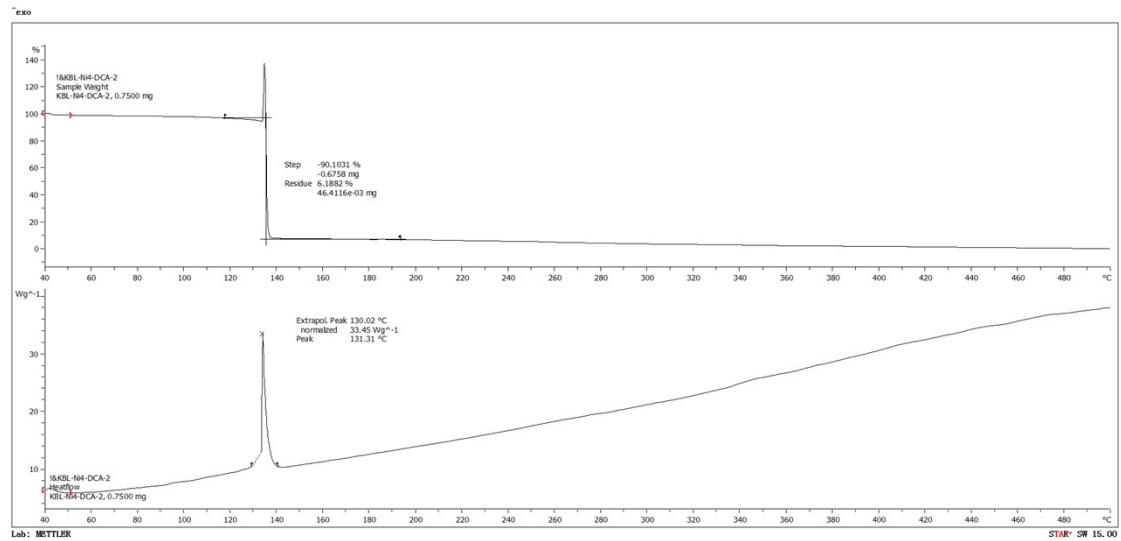

**Figure S6** TG-DSC of ECCs-1.

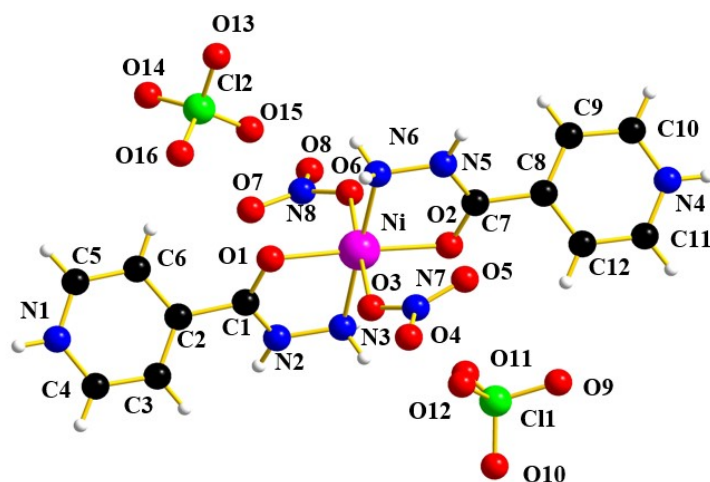

Figure S7. The single crystal of ECCs-1.

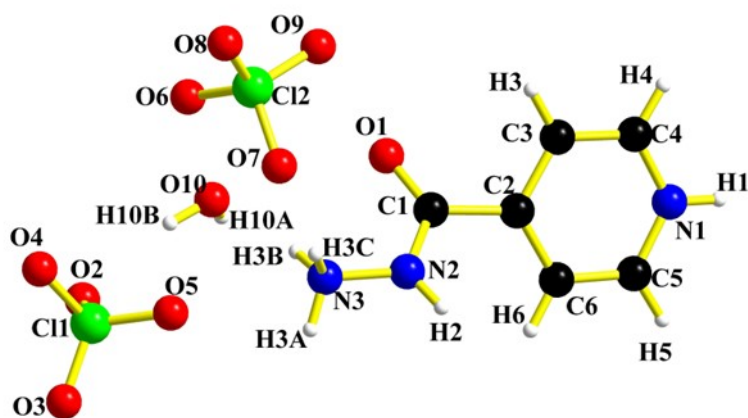

Figure S8. The single crystal of 4-PDCA·2HClO<sub>4</sub>·H<sub>2</sub>O.

## Supplementary Table S1-S3

Table S1: Details of heats of formation calculation of ECCs-1

|                                               |               |
|-----------------------------------------------|---------------|
| Electronic energy / Hartree                   | -4536.5986191 |
| ZPE / Hartree                                 | 0.239010      |
| ZPE scale factor                              | 0.9887        |
| H <sub>cor</sub> / Hartree                    | 0.2568911     |
| H <sub>f</sub> (gas) / kJ mol <sup>-1</sup>   | -259.1        |
| Area / Å <sup>2</sup>                         | 524.34415     |
| $\nu\sigma_{tot}^2$ / kcal mol <sup>-1</sup>  | 138.83029     |
| H <sub>sub</sub> / kJ mol <sup>-1</sup>       | 157.8         |
| H <sub>f</sub> (solid) / kJ mol <sup>-1</sup> | -452.9        |

**Table S2.** Crystallographic data for **ECCs-1**.

| Bond    | Bond length/Å | Bond   | Bond length /Å | Bond    | Bond length /Å |
|---------|---------------|--------|----------------|---------|----------------|
| Ni1-O1  | 1.966(2)      | O6-N8  | 1.284(4)       | C1-C2   | 1.489(4)       |
| Ni1-O2  | 1.963(2)      | O7-N8  | 1.236(4)       | C2-C3   | 1.395(5)       |
| Ni1-O3  | 2.380(2)      | O8-N8  | 1.240(4)       | C2-C6   | 1.392(4)       |
| Ni1-O6  | 2.373(2)      | N1-C5  | 1.336(5)       | C3-C4   | 1.376(6)       |
| Ni1-N3  | 2.022(3)      | N1-C4  | 1.336(4)       | C5-C6   | 1.378(6)       |
| Ni1-N6  | 2.014(3)      | N2-N3  | 1.417(4)       | C7-C8   | 1.486(4)       |
| C11-O12 | 1.423(4)      | N2-C1  | 1.321(4)       | C8-C9   | 1.398(5)       |
| C11-O9  | 1.403(5)      | N4-C11 | 1.342(5)       | C8-C12  | 1.391(4)       |
| C11-O10 | 1.447(3)      | N4-C10 | 1.341(5)       | C9-C10  | 1.371(6)       |
| C11-O11 | 1.419(3)      | N5-N6  | 1.422(4)       | C11-C12 | 1.372(6)       |
| C12-O14 | 1.420(3)      | N5-C7  | 1.323(4)       | C3-H3   | 0.93           |
| C12-O15 | 1.414(3)      | N1-H1  | 0.86           | C4-H4   | 0.93           |
| C12-O16 | 1.424(4)      | N2-H2  | 0.86           | C5-H5A  | 0.93           |
| C12-O13 | 1.420(3)      | N3-H3A | 0.9            | C6-H6   | 0.93           |
| O1-C1   | 1.251(4)      | N3-H3B | 0.9            | C9-H9   | 0.93           |
| O2-C7   | 1.248(4)      | N4-H4A | 0.86           | C10-H10 | 0.93           |
| O3-N7   | 1.265(4)      | N5-H5  | 0.86           | C11-H11 | 0.93           |
| O4-N7   | 1.255(4)      | N6-H6B | 0.9            | C12-H12 | 0.93           |
| O5-N7   | 1.237(4)      | N6-H6A | 0.9            |         |                |

  

| Bond      | Bond angle/° | Bond       | Bond angle/° | Bond     | Bond angle/° |
|-----------|--------------|------------|--------------|----------|--------------|
| O1-Ni1-O2 | 176.47(10)   | N3-N2-C1   | 116.3(3)     | C3-C2-C6 | 120.0(3)     |
| O1-Ni1-O3 | 80.82(9)     | Ni1-N3-N2  | 106.2(2)     | C1-C2-C3 | 121.8(3)     |
| O1-Ni1-O6 | 100.38(9)    | C10-N4-C11 | 122.8(3)     | C1-C2-C6 | 118.1(3)     |
| O1-Ni1-N3 | 82.78(11)    | N6-N5-C7   | 116.4(3)     | C2-C3-C4 | 118.9(3)     |
| O1-Ni1-N6 | 97.96(11)    | Ni1-N6-N5  | 106.5(2)     | N1-C4-C3 | 119.4(3)     |
| O2-Ni1-O3 | 95.73(9)     | O3-N7-O4   | 117.7(3)     | N1-C5-C6 | 119.8(3)     |
| O2-Ni1-O6 | 83.07(9)     | O3-N7-O5   | 121.2(3)     | C2-C6-C5 | 118.6(3)     |
| O2-Ni1-N3 | 96.48(11)    | O4-N7-O5   | 121.1(3)     | O2-C7-C8 | 118.8(3)     |



|             |            |            |          |                 |          |
|-------------|------------|------------|----------|-----------------|----------|
| O2-Ni1-N6   | 82.74(11)  | O6-N8-O7   | 119.2(3) | N5-C7-C8        | 119.0(3) |
| O3-Ni1-O6   | 178.80(8)  | O7-N8-O8   | 122.6(3) | O2-C7-N5        | 122.2(3) |
| O3-Ni1-N3   | 89.40(10)  | O6-N8-O8   | 118.3(3) | C9-C8-C12       | 120.0(3) |
| O3-Ni1-N6   | 90.05(10)  | C5-N1-H1   | 118      | C7-C8-C12       | 118.2(3) |
| O6-Ni1-N3   | 90.83(10)  | C4-N1-H1   | 118      | C7-C8-C9        | 121.6(3) |
| O6-Ni1-N6   | 89.71(10)  | N3-N2-H2   | 122      | C8-C9-C10       | 118.8(3) |
| N3-Ni1-N6   | 178.99(12) | C1-N2-H2   | 122      | N4-C10-C9       | 119.8(4) |
| O9-C11-O10  | 108.32(19) | Ni1-N3-H3A | 110      | N4-C11-C12      | 120.0(3) |
| O9-C11-O11  | 111.7(2)   | N2-N3-H3A  | 111      | C8-C12-C11      | 118.7(3) |
| O9-C11-O12  | 109.7(2)   | N2-N3-H3B  | 111      | C2-C3-H3        | 121      |
| O10-C11-O11 | 109.70(16) | Ni1-N3-H3B | 110      | C4-C3-H3        | 121      |
| O10-C11-O12 | 109.64(19) | H3A-N3-H3B | 109      | N1-C4-H4        | 120      |
| O11-C11-O12 | 107.84(18) | C11-N4-H4A | 119      | C3-C4-H4        | 120      |
| O13-C12-O14 | 109.7(2)   | C10-N4-H4A | 119      | C6-C5-H5A       | 120      |
| O13-C12-O16 | 107.7(2)   | N6-N5-H5   | 122      | N1-C5-H5A       | 120      |
| O14-C12-O15 | 108.36(18) | C7-N5-H5   | 122      | C2-C6-H6        | 121      |
| O14-C12-O16 | 109.2(2)   | N5-N6-H6A  | 110      | C5-C6-H6        | 121      |
| O15-C12-O16 | 111.2(2)   | Ni1-N6-H6A | 110      | C8-C9-H9        | 121      |
| O13-C12-O15 | 110.6(2)   | N5-N6-H6B  | 110      | C10-C9-H9       | 121      |
| Ni1-O1-C1   | 111.3(2)   | H6A-N6-H6B | 109      | N4-C10-H10      | 120      |
| Ni1-O2-C7   | 111.9(2)   | Ni1-N6-H6B | 110      | C9-C10-H10      | 120      |
| Ni1-O3-N7   | 129.12(19) | N2-C1-C2   | 117.9(3) | N4-C11-H11      | 120      |
| Ni1-O6-N8   | 126.66(19) | O1-C1-N2   | 122.8(3) | C12-C11-<br>H11 | 120      |
| C4-N1-C5    | 123.3(3)   | O1-C1-C2   | 119.3(3) | C11-C12-<br>H12 | 121      |

| Dihedral angle | Bond angle /° | Dihedral angle | Bond angle /° | Dihedral angle | Bond angle /° |
|----------------|---------------|----------------|---------------|----------------|---------------|
| O3-Ni1-O1-C1   | -95.4(2)      | O1-Ni1-N6-N5   | 172.41(19)    | N6-N5-C7-C8    | 177.2(3)      |
| O6-Ni1-O1-C1   | 84.7(2)       | O2-Ni1-N6-N5   | -4.10(19)     | C7-N5-N6-Ni1   | 3.4(3)        |
| N3-Ni1-O1-C1   | -4.8(2)       | O3-Ni1-N6-N5   | 91.7(2)       | O1-C1-C2-C6    | 36.6(4)       |

|              |           |                    |            |               |           |
|--------------|-----------|--------------------|------------|---------------|-----------|
| N6-Ni1-O1-C1 | 175.9(2)  | O6-Ni1-N6-N5       | -87.2(2)   | N2-C1-C2-C3   | 39.6(4)   |
| O3-Ni1-O2-C7 | -84.8(2)  | Ni1-O1-C1-C2       | 179.3(2)   | N2-C1-C2-C6   | -145.3(3) |
| O6-Ni1-O2-C7 | 95.1(2)   | Ni1-O1-C1-N2       | 1.3(4)     | O1-C1-C2-C3   | -138.5(3) |
| N3-Ni1-O2-C7 | -174.8(2) | Ni1-O2-C7-C8       | 179.1(2)   | C6-C2-C3-C4   | 0.3(4)    |
| N6-Ni1-O2-C7 | 4.5(2)    | Ni1-O2-C7-N5       | -4.0(4)    | C1-C2-C6-C5   | -176.0(3) |
| O1-Ni1-O3-N7 | -149.7(3) | Ni1-O3-N7-O4       | 172.27(19) | C3-C2-C6-C5   | -0.8(4)   |
| O2-Ni1-O3-N7 | 31.1(3)   | Ni1-O3-N7-O5       | -7.3(4)    | C1-C2-C3-C4   | 175.3(3)  |
| N3-Ni1-O3-N7 | 127.6(3)  | Ni1-O6-N8-O7       | 16.9(4)    | C2-C3-C4-N1   | 0.2(4)    |
| N6-Ni1-O3-N7 | -51.6(3)  | Ni1-O6-N8-O8       | -162.8(2)  | N1-C5-C6-C2   | 0.8(4)    |
| O1-Ni1-O6-N8 | -25.7(3)  | C5-N1-C4-C3        | -0.2(5)    | O2-C7-C8-C12  | -38.6(4)  |
| O2-Ni1-O6-N8 | 153.6(3)  | C4-N1-C5-C6        | -0.3(5)    | O2-C7-C8-C9   | 136.6(3)  |
| N3-Ni1-O6-N8 | 57.1(3)   | N3-N2-C1-O1        | 5.3(5)     | N5-C7-C8-C12  | 144.4(3)  |
| N6-Ni1-O6-N8 | -123.7(3) | N3-N2-C1-C2        | -172.8(3)  | N5-C7-C8-C9   | -40.4(4)  |
| O1-Ni1-N3-N2 | 6.92(19)  | C1-N2-N3-Ni1       | -8.5(3)    | C12-C8-C9-C10 | 0.7(4)    |
| O2-Ni1-N3-N2 | -176.6(2) | C11-N4-C10-C9      | -1.2(5)    | C7-C8-C9-C10  | -174.4(3) |
| O3-Ni1-N3-N2 | 87.7(2)   | C10-N4-C11-<br>C12 | 0.7(6)     | C7-C8-C12-C11 | 174.2(3)  |
| O6-Ni1-N3-N2 | -93.4(2)  | N6-N5-C7-O2        | 0.3(5)     | C9-C8-C12-C11 | -1.1(5)   |
| C8-C9-C10-N4 | 0.4(5)    | N4-C11-C12-C8      | 0.4(5)     |               |           |

**Table S3.** Crystallographic data for **4-PDCA·2HClO<sub>4</sub>·H<sub>2</sub>O**.

| Bond     | Bond length/Å | Bond     | Bond length /Å | Bond  | Bond length /Å |
|----------|---------------|----------|----------------|-------|----------------|
| Cl1-O5   | 1.425(4)      | O10-H10B | 0.85(2)        | C1-C2 | 1.502(6)       |
| Cl1-O2   | 1.424(3)      | N1-C4    | 1.338(6)       | C2-C3 | 1.405(5)       |
| Cl1-O3   | 1.403(4)      | N1-C5    | 1.338(6)       | C2-C6 | 1.397(6)       |
| Cl1-O4   | 1.470(4)      | N2-N3    | 1.417(5)       | C3-C4 | 1.372(6)       |
| Cl2-O6   | 1.441(3)      | N2-C1    | 1.335(5)       | C5-C6 | 1.377(6)       |
| Cl2-O7   | 1.453(3)      | N1-H1    | 0.88           | C3-H3 | 0.95           |
| Cl2-O8   | 1.437(3)      | N2-H2    | 0.88           | C4-H4 | 0.95           |
| Cl2-O9   | 1.429(3)      | N3-H3C   | 0.91           | C5-H5 | 0.95           |
| O1-C1    | 1.227(5)      | N3-H3B   | 0.91           | C6-H6 | 0.95           |
| O10-H10A | 0.85(3)       | N3-H3A   | 0.91           |       |                |

| Bond          | Bond angle/° | Bond       | Bond angle/° | Bond     | Bond angle/° |
|---------------|--------------|------------|--------------|----------|--------------|
| O2-C11-O4     | 106.0(2)     | N3-N2-C1   | 117.7(3)     | C1-C2-C6 | 123.2(4)     |
| O2-C11-O5     | 111.6(2)     | C4-N1-H1   | 118          | C1-C2-C3 | 117.4(3)     |
| O3-C11-O4     | 108.3(2)     | C5-N1-H1   | 118          | C3-C2-C6 | 119.4(4)     |
| O3-C11-O5     | 111.8(2)     | N3-N2-H2   | 121          | C2-C3-C4 | 119.6(4)     |
| O4-C11-O5     | 107.6(2)     | C1-N2-H2   | 121          | N1-C4-C3 | 118.7(4)     |
| O2-C11-O3     | 111.3(2)     | N2-N3-H3C  | 109          | N1-C5-C6 | 119.5(4)     |
| O6-C12-O8     | 109.09(17)   | H3A-N3-H3B | 110          | C2-C6-C5 | 118.8(4)     |
| O6-C12-O9     | 110.9(2)     | H3B-N3-H3C | 109          | C4-C3-H3 | 120          |
| O6-C12-O7     | 108.76(15)   | N2-N3-H3B  | 109          | C2-C3-H3 | 120          |
| O7-C12-O9     | 108.94(18)   | H3A-N3-H3C | 110          | N1-C4-H4 | 121          |
| O8-C12-O9     | 110.0(2)     | N2-N3-H3A  | 109          | C3-C4-H4 | 121          |
| O7-C12-O8     | 109.17(16)   | N2-C1-C2   | 115.9(3)     | C6-C5-H5 | 120          |
| H10A-O10-H10B | 108(3)       | O1-C1-N2   | 123.4(4)     | N1-C5-H5 | 120          |
| C4-N1-C5      | 124.1(4)     | O1-C1-C2   | 120.7(4)     | C5-C6-H6 | 121          |
| C2-C6-H6      | 121          |            |              |          |              |

| Dihedral angle | Bond angle /° | Dihedral angle | Bond angle /° | Dihedral angle | Bond angle /° |
|----------------|---------------|----------------|---------------|----------------|---------------|
| C5-N1-C4-C3    | -1.4(7)       | O1-C1-C2-C6    | -138.2(4)     | C1-C2-C6-C5    | 176.2(4)      |
| C4-N1-C5-C6    | 0.9(7)        | N2-C1-C2-C3    | -142.2(4)     | C3-C2-C6-C5    | -1.0(6)       |
| N3-N2-C1-O1    | 4.9(6)        | N2-C1-C2-C6    | 40.5(5)       | C2-C3-C4-N1    | 0.6(6)        |
| N3-N2-C1-C2    | -173.8(3)     | C1-C2-C3-C4    | -176.8(4)     | N1-C5-C6-C2    | 0.3(7)        |
| O1-C1-C2-C3    | 39.0(5)       | C6-C2-C3-C4    | 0.6(6)        |                |               |
